# Supplementary material for: Web Search Queries Can Predict Stock Market Volumes
Source: PubMed Central journal article supplement (PMC3400625; doi:10.1371/journal.pone.0040014), 2012-07-19
Supplement: pone.0040014.s001.pdf [file pone.0040014.s001.pdf]

## **SUPPORTING INFORMATION S1: Web search queries can predict stock market volumes.**

Ilaria Bordino<sup>1</sup>, Stefano Battiston<sup>2</sup>, Guido Caldarelli<sup>3,4,5</sup>, Matthieu Cristelli<sup>3,\*</sup>, Antti Ukkonen<sup>1</sup>, Ingmar Weber<sup>1</sup>

**1** Yahoo! Research, Barcelona, Spain

**2** ETH Chair of System Design, Zurich, Switzerland

**3** Inst. of Complex Systems CNR, “Sapienza” University, Rome, Italy

**4** London Institute for Mathematical Sciences, London, United Kingdom

**5** IMT - Institute for Advanced Studies, Lucca, Italy

\* E-mail: [matthieu.cristelli@roma1.infn.it](mailto:matthieu.cristelli@roma1.infn.it)

### **1 Data Analysis and Results: all the NASDAQ-100 stocks**

In this section we report the complete results of the stocks on which the averages shown and discussed in the main paper are performed.

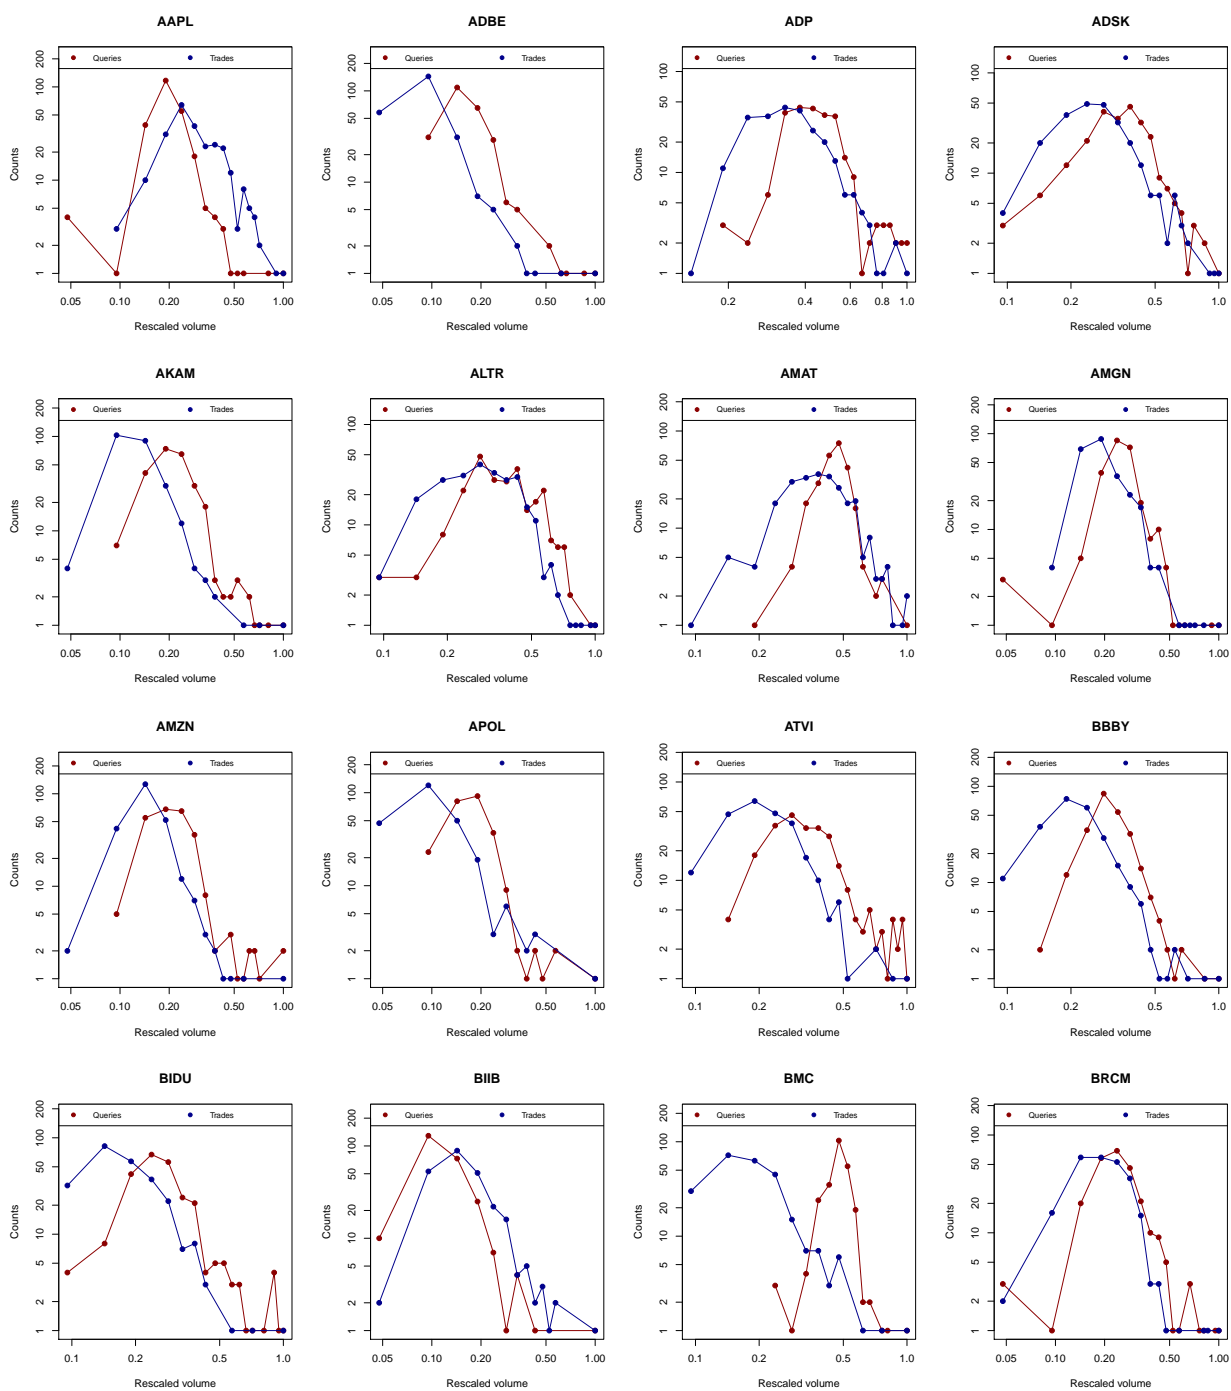

**Figure S 1. Histograms of trading volumes and query volumes for all the 87 clean stocks.** Most of the distributions appear to be fat-tailed. All the series have been rescaled dividing them by their maximum value.

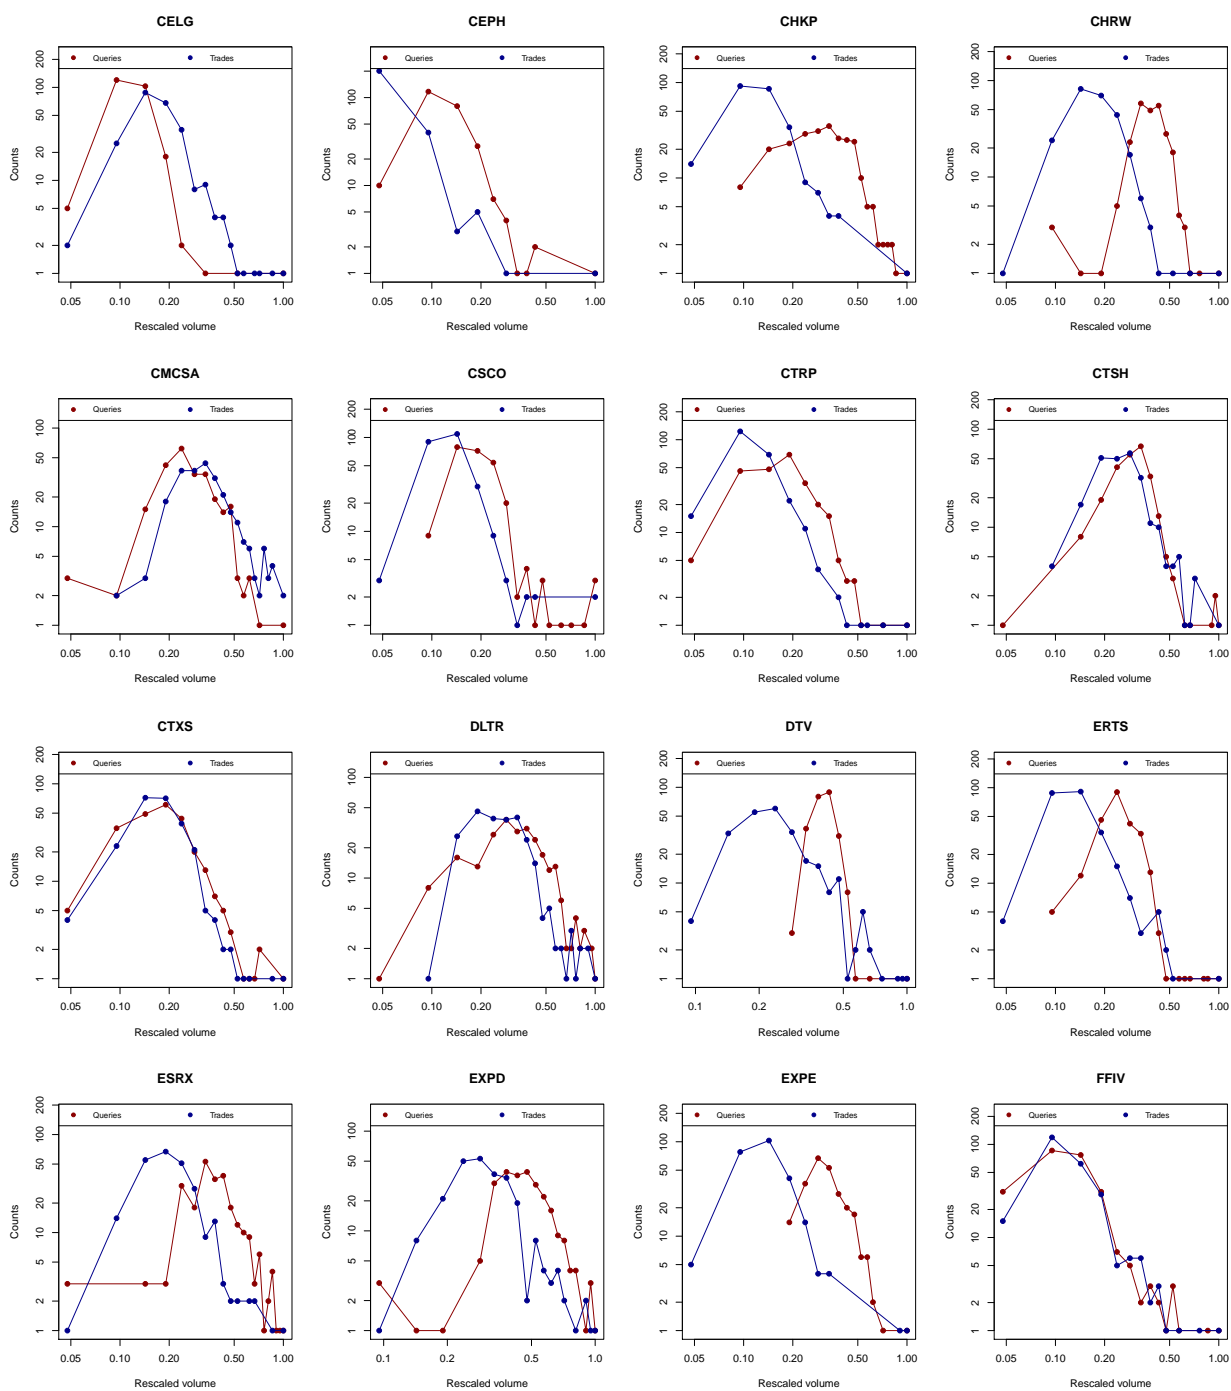

**Figure S 2.** Histograms of trading volumes and query volumes for all the 87 clean stocks. Most of the distributions appear to be fat-tailed. All the series have been rescaled dividing them by their maximum value.

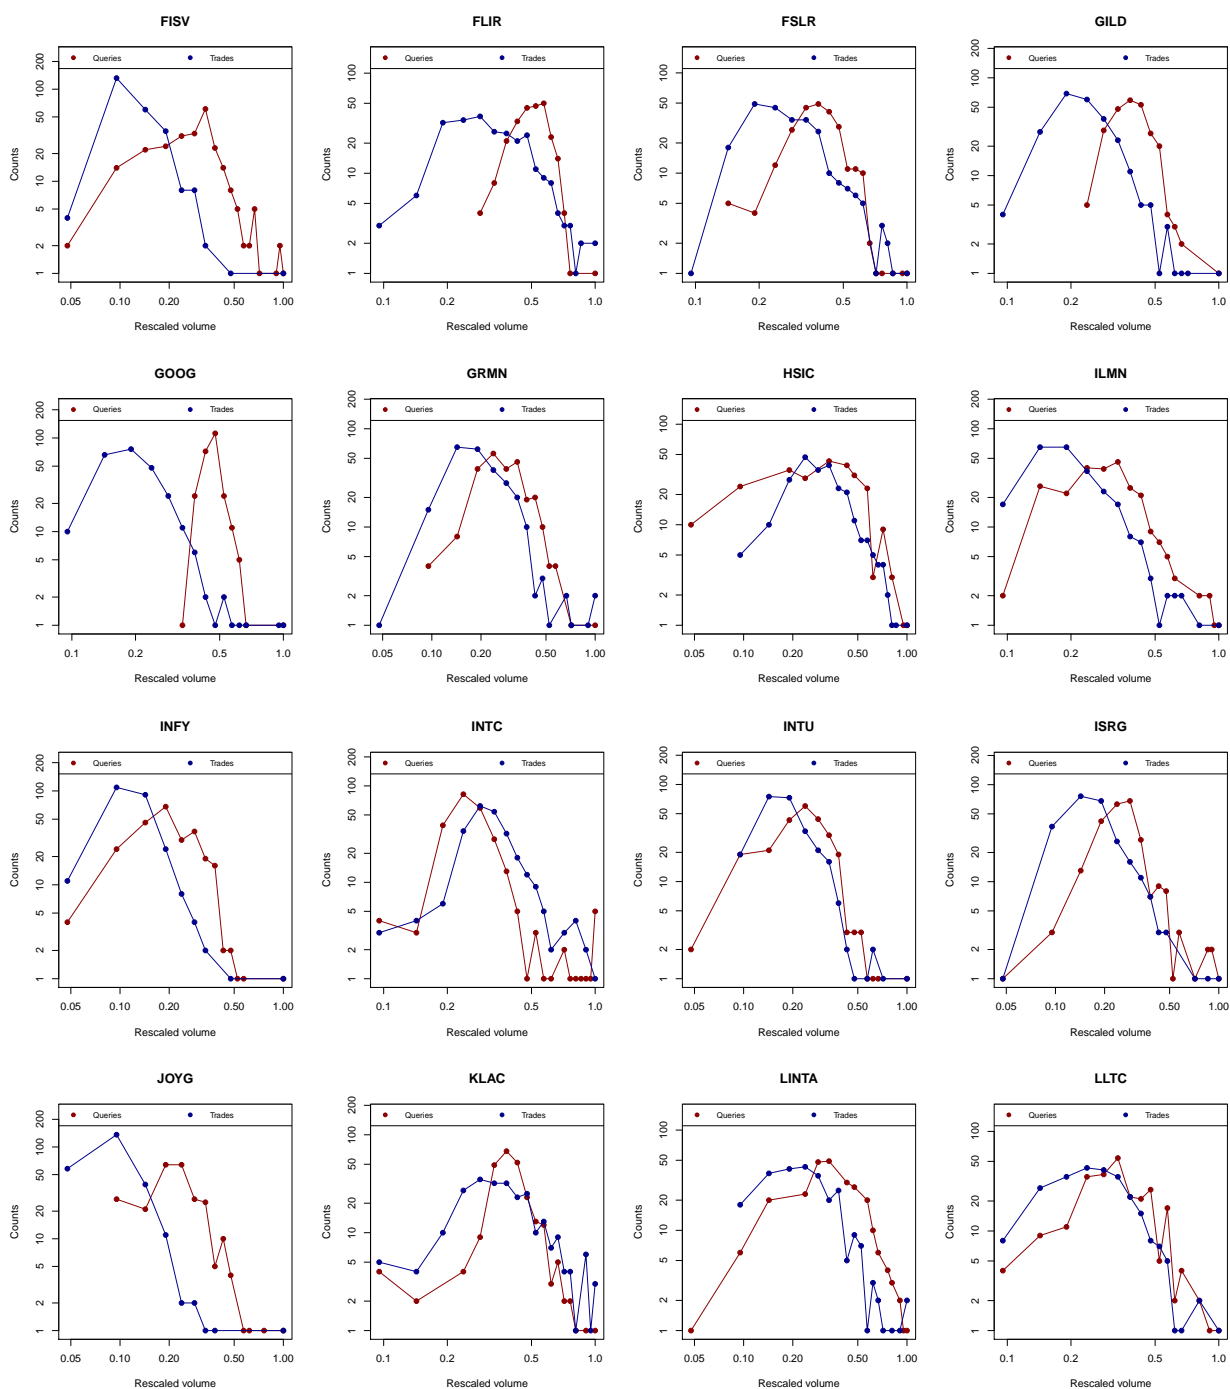

**Figure S 3. Histograms of trading volumes and query volumes for all the 87 clean stocks.** Most of the distributions appear to be fat-tailed. All the series have been rescaled dividing them by their maximum value.

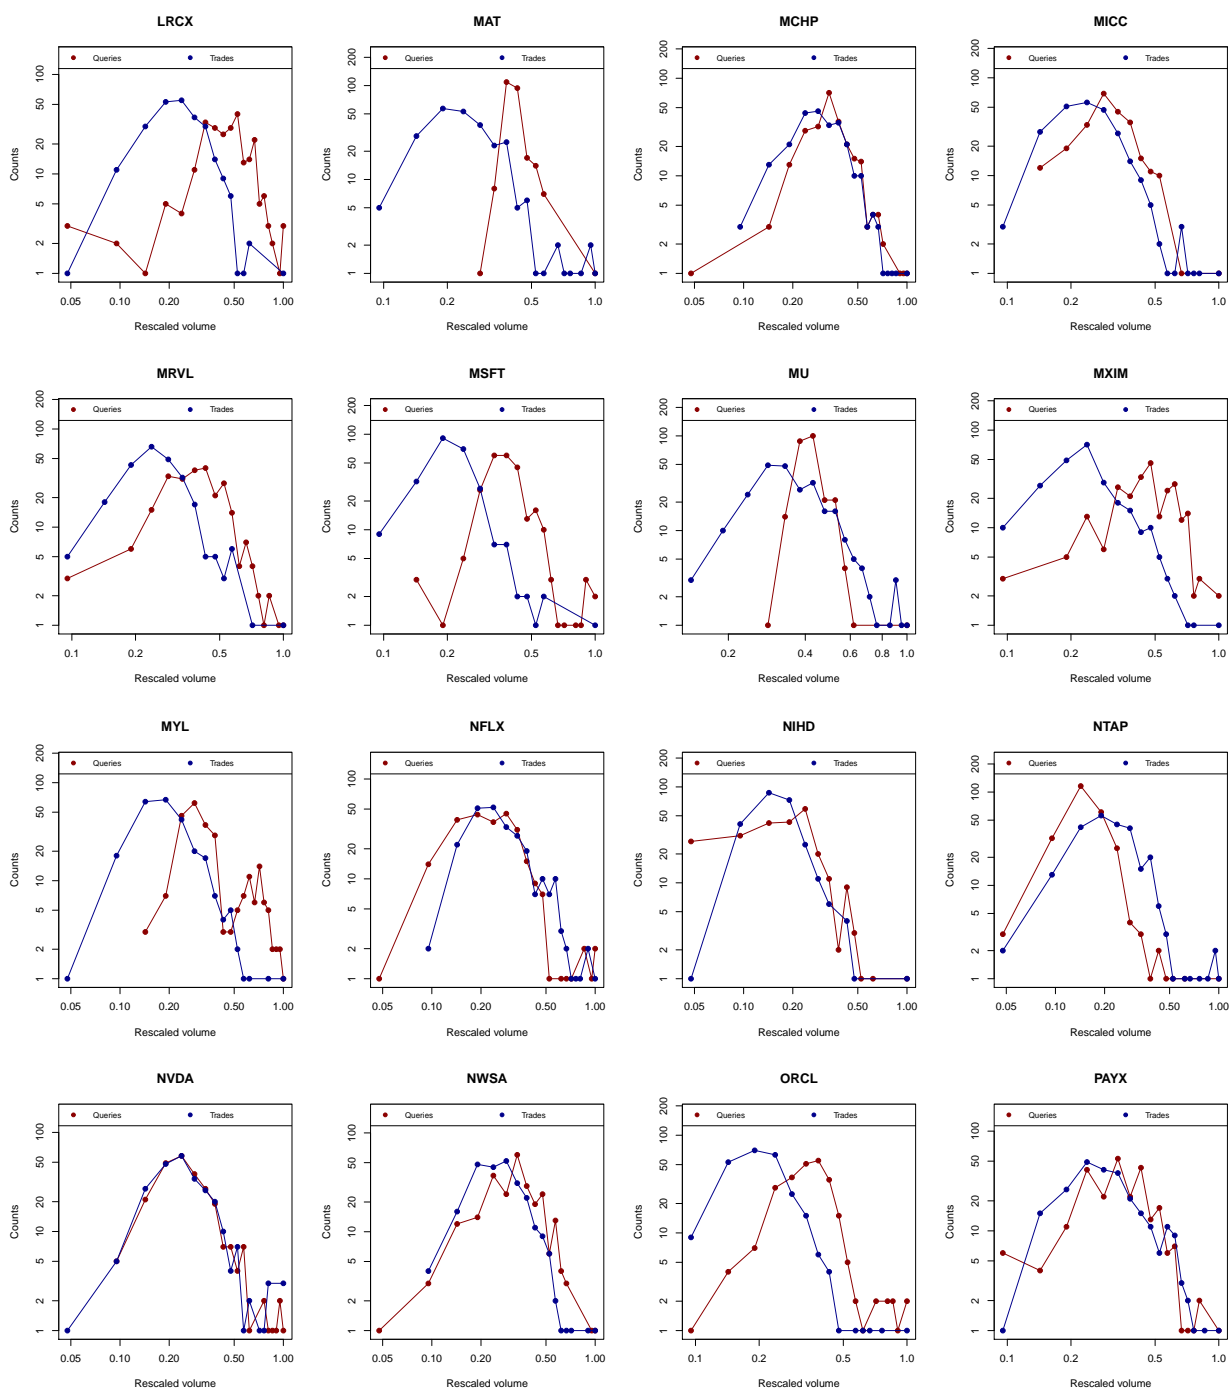

**Figure S 4. Histograms of trading volumes and query volumes for all the 87 clean stocks.** Most of the distributions appear to be fat-tailed. All the series have been rescaled dividing them by their maximum value.

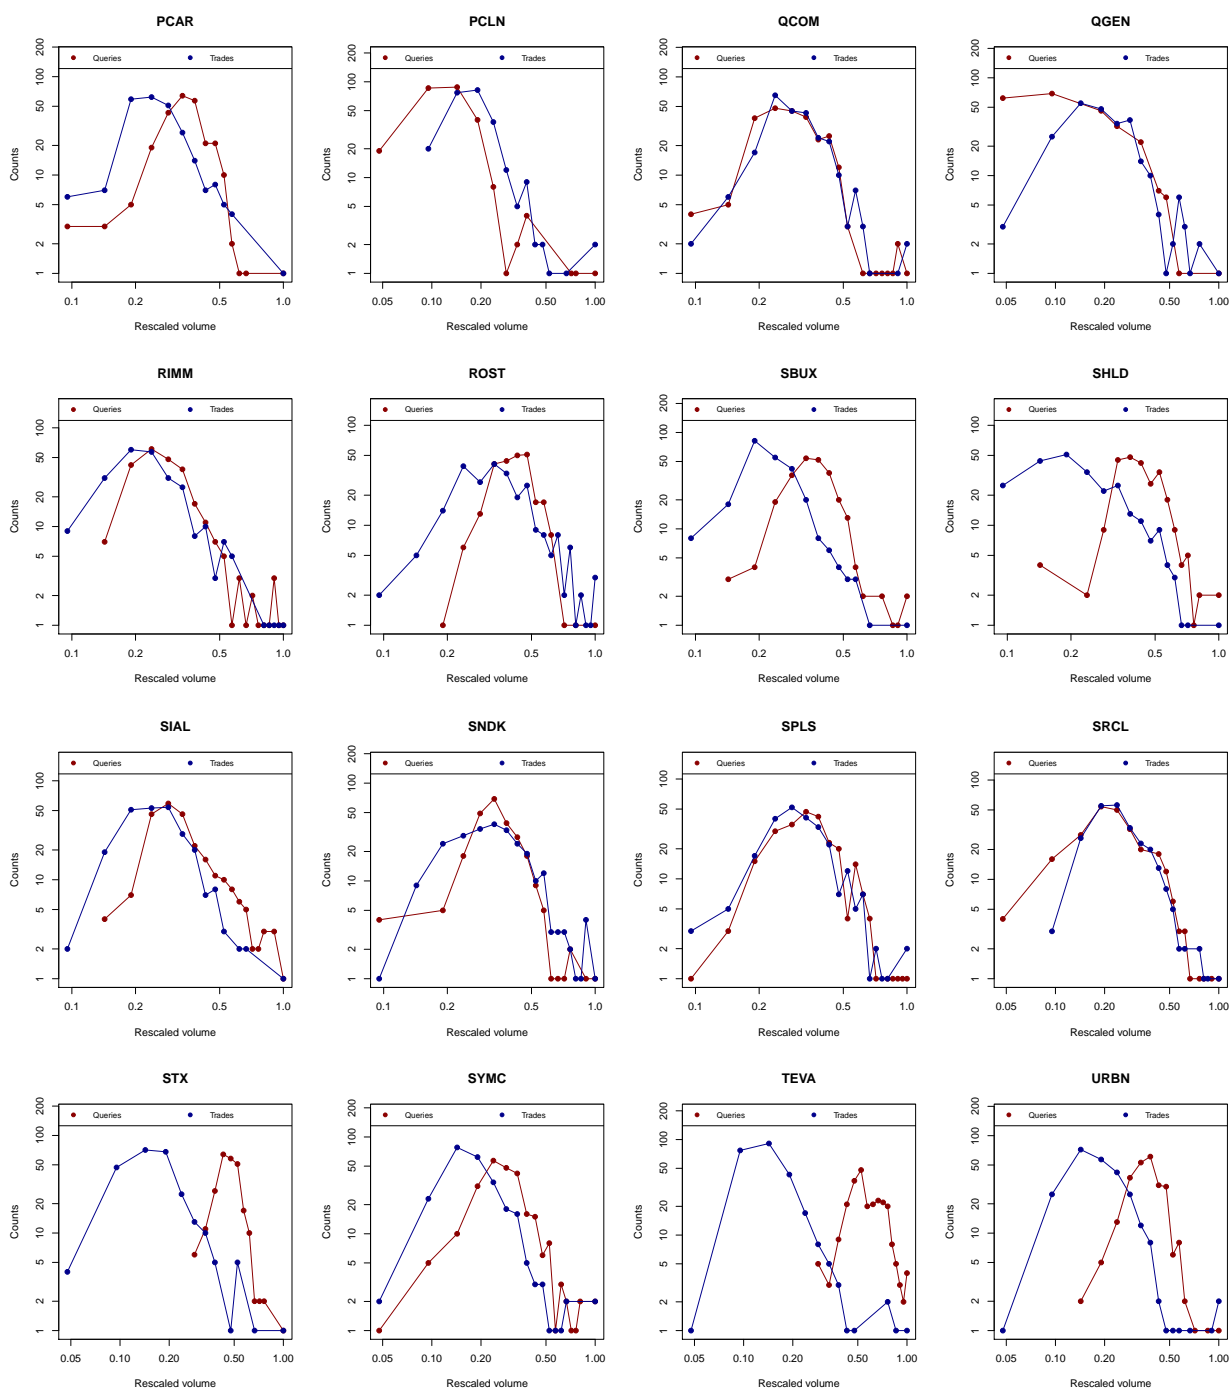

**Figure S 5. Histograms of trading volumes and query volumes for all the 87 clean stocks.** Most of the distributions appear to be fat-tailed. All the series have been rescaled dividing them by their maximum value.

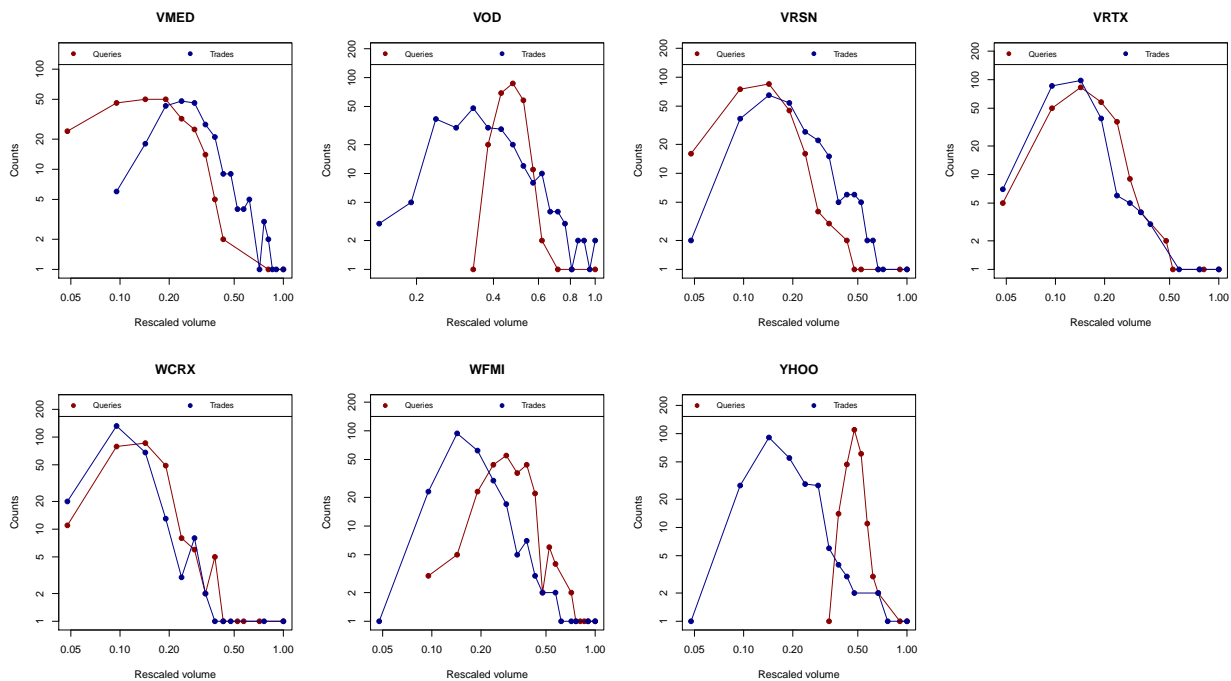

**Figure S 6.** Histograms of trading volumes and query volumes for all the 87 clean stocks. Most of the distributions appear to be fat-tailed. All the series have been rescaled dividing them by their maximum value.

Table S 1. Values of cross-correlation functions for the 87 *clean* stocks.

| Ticker | $\delta=-5$ | $\delta=-4$ | $\delta=-3$ | $\delta=-2$ | $\delta=-1$ | $\delta=0$ | $\delta=1$ | $\delta=2$ | $\delta=3$ | $\delta=4$ | $\delta=5$ |
|--------|-------------|-------------|-------------|-------------|-------------|------------|------------|------------|------------|------------|------------|
| AAPL   | 0.03        | 0.07        | 0.07        | 0.13        | 0.30        | 0.58       | 0.40       | 0.19       | 0.13       | 0.05       | 0.04       |
| ADBE   | 0.08        | 0.12        | 0.14        | 0.19        | 0.47        | 0.83       | 0.51       | 0.19       | 0.09       | 0.10       | 0.11       |
| ADP    | -0.19       | -0.21       | -0.23       | -0.16       | -0.15       | -0.15      | -0.18      | -0.19      | -0.15      | -0.14      | -0.15      |
| ADSK   | -0.16       | -0.15       | -0.03       | 0.01        | 0.09        | 0.19       | 0.26       | 0.03       | -0.09      | -0.04      | -0.09      |
| AKAM   | -0.04       | -0.06       | 0.03        | 0.07        | 0.22        | 0.72       | 0.49       | 0.20       | 0.11       | 0.02       | -0.01      |
| ALTR   | 0.34        | 0.40        | 0.40        | 0.37        | 0.42        | 0.55       | 0.53       | 0.39       | 0.41       | 0.37       | 0.38       |
| AMAT   | 0.05        | 0.04        | 0.03        | 0.03        | 0.05        | 0.10       | 0.15       | 0.04       | -0.01      | -0.07      | -0.10      |
| AMGN   | -0.02       | 0.03        | 0.03        | 0.10        | 0.19        | 0.36       | 0.35       | 0.18       | 0.14       | 0.11       | -0.02      |
| AMZN   | -0.07       | -0.03       | -0.04       | -0.02       | 0.13        | 0.48       | 0.43       | 0.04       | -0.02      | 0.01       | -0.02      |
| APOL   | 0.02        | 0.06        | 0.10        | 0.21        | 0.43        | 0.79       | 0.55       | 0.22       | 0.12       | 0.07       | 0.03       |
| ATVI   | -0.04       | 0.05        | 0.10        | 0.16        | 0.27        | 0.39       | 0.39       | 0.22       | 0.23       | 0.18       | 0.10       |
| BBBY   | 0.04        | 0.19        | 0.13        | 0.12        | 0.21        | 0.43       | 0.39       | 0.14       | 0.09       | 0.07       | 0.14       |
| BIDU   | 0.10        | 0.09        | 0.12        | 0.19        | 0.32        | 0.49       | 0.42       | 0.16       | 0.11       | 0.05       | 0.04       |
| BIIB   | 0.06        | 0.09        | 0.13        | 0.10        | 0.21        | 0.59       | 0.23       | 0.20       | 0.10       | 0.07       | 0.09       |
| BMC    | 0.05        | 0.14        | 0.08        | 0.19        | 0.04        | 0.17       | 0.20       | 0.21       | 0.18       | 0.10       | 0.12       |
| BRCM   | -0.02       | -0.02       | 0.04        | 0.09        | 0.22        | 0.53       | 0.45       | 0.15       | 0.07       | 0.05       | 0.01       |
| CELG   | 0.00        | 0.03        | 0.01        | 0.02        | 0.20        | 0.65       | 0.29       | 0.03       | 0.05       | 0.04       | 0.05       |
| CEPH   | 0.16        | 0.26        | 0.22        | 0.14        | 0.32        | 0.80       | 0.44       | 0.24       | 0.12       | 0.13       | 0.15       |
| CHKP   | -0.03       | -0.06       | -0.04       | -0.07       | 0.06        | 0.09       | 0.03       | -0.02      | -0.05      | -0.03      | -0.01      |
| CHRW   | 0.03        | 0.12        | 0.07        | -0.05       | 0.00        | 0.16       | 0.23       | 0.07       | 0.05       | -0.06      | -0.06      |
| CMCSA  | -0.20       | -0.16       | -0.15       | -0.16       | -0.10       | 0.02       | -0.05      | -0.12      | -0.12      | -0.13      | -0.11      |
| CSCO   | 0.04        | 0.07        | 0.13        | 0.36        | 0.53        | 0.74       | 0.63       | 0.34       | 0.26       | 0.17       | 0.12       |
| CTRP   | -0.02       | 0.08        | 0.01        | 0.11        | 0.19        | 0.57       | 0.26       | 0.06       | 0.03       | 0.04       | 0.06       |
| CTSH   | -0.06       | 0.02        | 0.07        | 0.11        | 0.15        | 0.38       | 0.12       | 0.07       | 0.06       | 0.01       | -0.05      |
| CTXS   | 0.11        | 0.15        | 0.14        | 0.18        | 0.26        | 0.55       | 0.35       | 0.14       | 0.14       | 0.10       | 0.06       |
| DLTR   | 0.07        | 0.16        | 0.17        | 0.14        | 0.23        | 0.42       | 0.25       | 0.24       | 0.15       | 0.07       | 0.04       |
| DTV    | 0.04        | 0.02        | 0.06        | 0.09        | 0.05        | 0.03       | 0.03       | -0.05      | 0.05       | 0.03       | -0.01      |
| ERTS   | 0.06        | 0.17        | 0.22        | 0.24        | 0.34        | 0.62       | 0.53       | 0.18       | 0.05       | -0.02      | 0.02       |
| ESRX   | 0.14        | 0.23        | 0.17        | 0.21        | 0.21        | 0.43       | 0.31       | 0.17       | 0.16       | 0.09       | 0.05       |
| EXPD   | 0.01        | 0.07        | 0.08        | 0.09        | 0.24        | 0.37       | 0.31       | 0.22       | 0.18       | 0.16       | 0.11       |
| EXPE   | 0.10        | 0.14        | 0.13        | 0.16        | 0.27        | 0.52       | 0.40       | 0.17       | 0.17       | 0.19       | 0.15       |
| FFIV   | 0.06        | 0.06        | 0.13        | 0.21        | 0.35        | 0.65       | 0.56       | 0.33       | 0.21       | 0.14       | 0.13       |
| FISV   | 0.03        | 0.01        | -0.05       | 0.08        | 0.08        | 0.28       | 0.12       | 0.02       | 0.02       | 0.06       | 0.11       |
| FLIR   | -0.13       | -0.11       | -0.10       | -0.15       | -0.14       | -0.13      | -0.09      | -0.12      | -0.16      | -0.16      | -0.16      |
| FSLR   | 0.01        | 0.05        | 0.02        | 0.13        | 0.29        | 0.55       | 0.44       | 0.18       | 0.12       | 0.02       | -0.01      |
| GILD   | 0.03        | 0.13        | 0.13        | 0.12        | 0.13        | 0.18       | 0.14       | 0.06       | 0.08       | 0.03       | 0.02       |
| GOOG   | -0.09       | 0.03        | -0.00       | 0.01        | 0.04        | 0.02       | 0.09       | -0.02      | -0.05      | -0.01      | -0.07      |
| GRMN   | 0.07        | 0.10        | 0.07        | 0.05        | 0.23        | 0.46       | 0.24       | 0.12       | 0.09       | 0.07       | 0.08       |
| HSIC   | -0.20       | -0.18       | -0.13       | -0.10       | 0.04        | 0.07       | -0.02      | -0.07      | -0.00      | -0.03      | -0.16      |
| ILMN   | -0.01       | 0.06        | 0.12        | 0.16        | 0.20        | 0.40       | 0.39       | 0.31       | 0.27       | 0.21       | 0.14       |
| INFY   | -0.05       | -0.09       | 0.02        | 0.06        | 0.14        | 0.53       | 0.20       | 0.06       | 0.10       | 0.03       | 0.00       |
| INTC   | 0.07        | 0.04        | 0.00        | 0.05        | 0.18        | 0.44       | 0.40       | 0.14       | 0.09       | 0.05       | 0.03       |
| INTU   | -0.08       | -0.10       | -0.10       | -0.07       | -0.00       | 0.31       | 0.22       | 0.10       | 0.03       | -0.05      | -0.10      |
| ISRG   | 0.07        | 0.13        | 0.18        | 0.21        | 0.38        | 0.67       | 0.64       | 0.29       | 0.20       | 0.11       | 0.05       |



Table S 2. Values of cross-correlation functions for the 87 clean stocks.

| Ticker | $\delta = -5$ | $\delta = -4$ | $\delta = -3$ | $\delta = -2$ | $\delta = -1$ | $\delta = 0$ | $\delta = 1$ | $\delta = 2$ | $\delta = 3$ | $\delta = 4$ | $\delta = 5$ |
|--------|---------------|---------------|---------------|---------------|---------------|--------------|--------------|--------------|--------------|--------------|--------------|
| JOYG   | 0.00          | 0.05          | 0.13          | 0.10          | 0.17          | 0.27         | 0.13         | 0.09         | 0.06         | 0.09         | 0.05         |
| KLAC   | 0.36          | 0.40          | 0.40          | 0.46          | 0.45          | 0.43         | 0.49         | 0.46         | 0.47         | 0.43         | 0.39         |
| LINTA  | 0.06          | -0.04         | 0.02          | 0.00          | 0.04          | 0.04         | 0.01         | 0.01         | 0.02         | 0.04         | -0.06        |
| LLTC   | 0.16          | 0.22          | 0.18          | 0.22          | 0.32          | 0.39         | 0.32         | 0.21         | 0.13         | 0.10         | 0.12         |
| LRCX   | -0.01         | 0.00          | -0.02         | 0.04          | 0.17          | 0.24         | 0.20         | 0.16         | 0.14         | -0.03        | 0.00         |
| MAT    | 0.06          | 0.21          | 0.07          | 0.10          | 0.09          | 0.04         | 0.06         | 0.03         | -0.02        | 0.05         | 0.02         |
| MCHP   | 0.22          | 0.21          | 0.22          | 0.23          | 0.23          | 0.24         | 0.32         | 0.25         | 0.18         | 0.14         | 0.10         |
| MICC   | 0.04          | 0.10          | 0.06          | 0.14          | 0.16          | 0.21         | 0.17         | 0.06         | 0.04         | 0.02         | 0.03         |
| MRVL   | -0.06         | 0.09          | 0.02          | 0.06          | 0.12          | 0.40         | 0.37         | 0.02         | 0.01         | 0.03         | -0.00        |
| MSFT   | -0.09         | -0.02         | -0.06         | 0.02          | 0.17          | 0.42         | 0.35         | 0.02         | 0.05         | 0.04         | 0.09         |
| MU     | -0.13         | -0.03         | -0.05         | -0.07         | -0.06         | -0.05        | -0.05        | -0.10        | -0.08        | -0.07        | -0.15        |
| MXIM   | 0.11          | 0.09          | 0.19          | 0.18          | 0.22          | 0.29         | 0.11         | -0.04        | 0.03         | 0.03         | 0.01         |
| MYL    | -0.10         | -0.07         | -0.07         | -0.10         | -0.11         | -0.07        | -0.07        | -0.06        | -0.07        | -0.04        | -0.01        |
| NFLX   | 0.10          | 0.16          | 0.16          | 0.24          | 0.47          | 0.68         | 0.54         | 0.25         | 0.19         | 0.16         | 0.13         |
| NIHD   | 0.10          | 0.11          | 0.20          | 0.24          | 0.30          | 0.56         | 0.34         | 0.25         | 0.15         | 0.11         | 0.09         |
| NTAP   | -0.06         | 0.02          | 0.01          | 0.06          | 0.26          | 0.61         | 0.46         | 0.18         | 0.09         | 0.09         | 0.11         |
| NVDA   | 0.23          | 0.36          | 0.38          | 0.46          | 0.56          | 0.79         | 0.68         | 0.47         | 0.42         | 0.38         | 0.29         |
| NWSA   | -0.04         | 0.03          | -0.03         | -0.10         | -0.01         | 0.06         | 0.09         | -0.04        | -0.04        | -0.03        | -0.08        |
| ORCL   | 0.09          | 0.17          | 0.09          | 0.07          | 0.23          | 0.52         | 0.43         | 0.13         | 0.16         | 0.10         | 0.03         |
| PAYX   | 0.06          | 0.08          | -0.00         | 0.05          | 0.04          | 0.04         | 0.03         | 0.00         | -0.00        | -0.06        | -0.03        |
| PCAR   | 0.04          | 0.14          | 0.14          | 0.15          | 0.16          | 0.27         | 0.28         | 0.14         | 0.14         | 0.15         | 0.06         |
| PCLN   | -0.10         | -0.04         | -0.03         | 0.01          | 0.20          | 0.51         | 0.37         | 0.06         | -0.01        | -0.06        | -0.06        |
| QCOM   | -0.15         | -0.11         | -0.12         | -0.06         | 0.09          | 0.24         | 0.15         | -0.06        | -0.10        | -0.09        | -0.14        |
| QGEN   | 0.09          | 0.09          | 0.06          | 0.11          | 0.09          | 0.35         | 0.31         | 0.15         | 0.13         | 0.10         | 0.21         |
| RIMM   | 0.03          | 0.12          | 0.11          | 0.14          | 0.31          | 0.66         | 0.58         | 0.24         | 0.20         | 0.11         | 0.05         |
| ROST   | -0.22         | -0.12         | -0.15         | -0.11         | -0.17         | -0.08        | -0.12        | -0.10        | -0.13        | -0.20        | -0.16        |
| SBUX   | -0.08         | 0.03          | 0.08          | 0.09          | 0.19          | 0.41         | 0.25         | 0.18         | 0.11         | 0.06         | -0.04        |
| SHLD   | 0.10          | 0.14          | 0.11          | 0.22          | 0.21          | 0.38         | 0.26         | 0.17         | 0.15         | 0.15         | 0.07         |
| SIAL   | -0.05         | 0.00          | -0.02         | -0.03         | -0.05         | -0.05        | 0.00         | -0.01        | 0.01         | -0.01        | 0.02         |
| SNDK   | 0.04          | 0.02          | 0.11          | 0.23          | 0.30          | 0.45         | 0.37         | 0.09         | 0.13         | 0.11         | 0.01         |
| SPLS   | -0.19         | -0.17         | -0.17         | -0.17         | -0.04         | 0.11         | 0.02         | -0.15        | -0.16        | -0.18        | -0.11        |
| SRCL   | 0.05          | 0.02          | -0.04         | 0.01          | 0.12          | 0.27         | 0.24         | 0.21         | 0.08         | 0.05         | 0.05         |
| STX    | 0.11          | 0.23          | 0.16          | 0.20          | 0.24          | 0.37         | 0.31         | 0.13         | 0.03         | 0.05         | -0.01        |
| SYMC   | -0.00         | 0.02          | 0.11          | 0.17          | 0.25          | 0.58         | 0.44         | 0.21         | 0.14         | 0.04         | 0.04         |
| TEVA   | 0.15          | 0.17          | 0.23          | 0.24          | 0.29          | 0.40         | 0.24         | 0.21         | 0.17         | 0.14         | 0.11         |
| URBN   | 0.00          | 0.08          | 0.10          | 0.09          | 0.17          | 0.37         | 0.32         | 0.14         | 0.10         | 0.01         | -0.01        |
| VMED   | -0.09         | -0.14         | -0.13         | -0.13         | -0.12         | -0.09        | -0.09        | -0.13        | -0.09        | -0.08        | -0.12        |
| VOD    | 0.10          | 0.10          | 0.07          | 0.10          | 0.11          | 0.17         | 0.15         | 0.13         | 0.17         | 0.15         | 0.03         |
| VRSN   | 0.00          | 0.05          | 0.01          | 0.18          | 0.44          | 0.56         | 0.40         | 0.26         | 0.22         | 0.18         | 0.16         |
| VRTX   | 0.02          | 0.14          | 0.32          | 0.42          | 0.30          | 0.50         | 0.24         | 0.07         | 0.19         | 0.14         | 0.16         |
| WCRX   | 0.05          | 0.06          | 0.06          | 0.07          | 0.17          | 0.51         | 0.23         | 0.11         | 0.05         | 0.05         | 0.01         |
| WFMI   | -0.00         | -0.05         | -0.01         | 0.06          | 0.23          | 0.45         | 0.31         | 0.03         | -0.03        | -0.06        | -0.06        |
| YHOO   | 0.06          | 0.15          | 0.15          | 0.16          | 0.23          | 0.38         | 0.25         | -0.02        | -0.00        | 0.02         | -0.03        |

The values of the cross-correlation function  $r(\delta)$  for  $\delta > 0$  are on average larger than the value of  $r(-\delta)$ . In fact considering only the stocks for which  $r(1) > 0$  (there are 8 stocks for which  $r(1) < 0$ ) we observe that for 68 stocks it holds that  $r(1) > r(-1)$  while for the remaining 11 stocks we observe  $r(1) \leq r(-1)$ .

**Table S 3. Values of cross-correlation functions for the discarded stocks from the original set.**

| <b>Ticker</b> | $\delta = -5$ | $\delta = -4$ | $\delta = -3$ | $\delta = -2$ | $\delta = -1$ | $\delta = 0$ | $\delta = 1$ | $\delta = 2$ | $\delta = 3$ | $\delta = 4$ | $\delta = 5$ |
|---------------|---------------|---------------|---------------|---------------|---------------|--------------|--------------|--------------|--------------|--------------|--------------|
| CERN          | -0.03         | -0.02         | 0.03          | 0.02          | 0.00          | 0.03         | -0.01        | -0.00        | 0.03         | 0.02         | -0.06        |
| COST          | -0.28         | -0.21         | -0.18         | -0.19         | -0.20         | -0.17        | -0.06        | -0.07        | -0.16        | -0.10        | -0.11        |
| DELL          | -0.05         | -0.04         | -0.01         | 0.01          | -0.11         | -0.11        | -0.05        | -0.04        | -0.05        | -0.02        | -0.07        |
| EBAY          | -0.08         | -0.07         | -0.10         | -0.16         | -0.21         | -0.18        | -0.10        | -0.18        | -0.17        | -0.20        | -0.20        |
| FAST          | -0.14         | -0.12         | -0.12         | -0.12         | -0.06         | -0.08        | -0.07        | -0.14        | -0.11        | -0.10        | -0.13        |
| FLEX          | -0.12         | 0.05          | -0.15         | -0.19         | -0.20         | -0.09        | -0.08        | -0.16        | -0.20        | -0.18        | -0.18        |
| LIFE          | -0.07         | 0.01          | -0.04         | -0.01         | -0.09         | -0.08        | -0.05        | -0.06        | 0.01         | 0.11         | 0.11         |
| ORLY          | 0.01          | -0.01         | -0.04         | -0.00         | 0.04          | 0.11         | 0.14         | 0.07         | 0.09         | 0.07         | 0.10         |
| WYNN          | -0.01         | 0.03          | 0.06          | 0.08          | -0.02         | 0.02         | 0.10         | -0.03        | 0.00         | 0.04         | -0.08        |
| XLNX          | 0.03          | -0.00         | 0.02          | 0.06          | 0.09          | 0.14         | 0.14         | -0.03        | -0.03        | -0.12        | -0.03        |
| XRAY          | -0.12         | -0.12         | -0.22         | -0.18         | -0.18         | -0.10        | -0.08        | -0.11        | -0.05        | -0.07        | -0.12        |

Most of the query volumes associated to these tickers can be traced back to non-financial origin.

Table S 4. Cross-correlation coefficient  $r(0)$  between query and trading volumes after removing largest events.

| <b>Ticker</b> | $r(0)$  | $r(0)$ –Top5 | $r(0)$ –Top 10 |
|---------------|---------|--------------|----------------|
| AAPL          | 0.5826  | 0.4769       | 0.4481         |
| ADBE          | 0.8326  | 0.5196       | 0.3137         |
| ADP           | -0.1456 | -0.1246      | -0.1120        |
| ADSK          | 0.1933  | 0.1966       | 0.1795         |
| AKAM          | 0.7243  | 0.4893       | 0.4059         |
| ALTR          | 0.5546  | 0.5229       | 0.4956         |
| AMAT          | 0.1014  | 0.1145       | 0.0732         |
| AMGN          | 0.3563  | 0.3165       | 0.3138         |
| AMZN          | 0.4838  | 0.3356       | 0.1784         |
| APOL          | 0.7927  | 0.5547       | 0.4614         |
| ATVI          | 0.3854  | 0.3291       | 0.2410         |
| BBBY          | 0.4300  | 0.2963       | 0.2290         |
| BIDU          | 0.4891  | 0.3355       | 0.3001         |
| BIIB          | 0.5877  | 0.3449       | 0.3320         |
| BMC           | 0.1676  | 0.1508       | 0.1600         |
| BRCM          | 0.5342  | 0.2219       | 0.2338         |
| CELG          | 0.6508  | 0.3171       | 0.1942         |
| CEPH          | 0.7959  | 0.3208       | 0.2339         |
| CHKP          | 0.0939  | 0.0838       | 0.0808         |
| CHRW          | 0.1619  | 0.0559       | 0.0530         |
| CMCSA         | 0.0242  | -0.0299      | -0.0456        |
| CSCO          | 0.7352  | 0.5614       | 0.5014         |
| CTRP          | 0.5659  | 0.3203       | 0.2963         |
| CTSH          | 0.3791  | 0.2344       | 0.1756         |
| CTXS          | 0.5522  | 0.3525       | 0.2897         |
| DLTR          | 0.4243  | 0.3567       | 0.2830         |
| DTV           | 0.0308  | 0.0860       | 0.1069         |
| ERTS          | 0.6190  | 0.4764       | 0.3225         |
| ESRX          | 0.4319  | 0.3371       | 0.2189         |
| EXPD          | 0.3749  | 0.3186       | 0.3048         |
| EXPE          | 0.5177  | 0.3473       | 0.2712         |
| FFIV          | 0.6534  | 0.5410       | 0.5034         |
| FISV          | 0.2754  | 0.0568       | 0.0589         |
| FLIR          | -0.1267 | -0.1959      | -0.1932        |
| FSLR          | 0.5464  | 0.4577       | 0.4020         |
| GILD          | 0.1775  | 0.1901       | 0.2013         |
| GOOG          | 0.0199  | -0.0440      | -0.1211        |
| GRMN          | 0.4564  | 0.2749       | 0.2763         |
| HSIC          | 0.0706  | -0.0198      | 0.0053         |
| ILMN          | 0.4004  | 0.3020       | 0.3062         |
| INFY          | 0.5338  | 0.1080       | 0.0469         |
| INTC          | 0.4357  | 0.3178       | 0.3067         |
| INTU          | 0.3096  | 0.0262       | -0.0665        |
| ISRG          | 0.6683  | 0.5432       | 0.5590         |

**Table S 5. Cross-correlation coefficient  $r(0)$  between query and trading volumes after removing largest events.**

| <b>Ticker</b> | $r(0)$  | $r(0)$ -Top5 | $r(0)$ -Top 10 |
|---------------|---------|--------------|----------------|
| JOYG          | 0.2660  | 0.2147       | 0.1841         |
| KLAC          | 0.4307  | 0.4260       | 0.4305         |
| LINTA         | 0.0446  | -0.0066      | 0.0156         |
| LLTC          | 0.3896  | 0.3286       | 0.2471         |
| LRCX          | 0.2424  | 0.2749       | 0.2157         |
| MAT           | 0.0441  | -0.0104      | -0.1008        |
| MCHP          | 0.2411  | 0.1850       | 0.2042         |
| MICC          | 0.2099  | 0.1548       | 0.1556         |
| MRVL          | 0.3966  | 0.2554       | 0.2236         |
| MSFT          | 0.4216  | 0.3808       | 0.3361         |
| MU            | -0.0458 | -0.0440      | -0.0411        |
| MXIM          | 0.2948  | 0.2009       | 0.1671         |
| MYL           | -0.0665 | -0.0871      | -0.1243        |
| NFLX          | 0.6757  | 0.6314       | 0.6253         |
| NHID          | 0.5553  | 0.3644       | 0.2925         |
| NTAP          | 0.6102  | 0.4173       | 0.2906         |
| NVDA          | 0.7856  | 0.6866       | 0.6481         |
| NWSA          | 0.0620  | 0.0729       | 0.0794         |
| ORCL          | 0.5156  | 0.3493       | 0.3218         |
| PAYX          | 0.0365  | 0.1071       | 0.1005         |
| PCAR          | 0.2725  | 0.1737       | 0.1798         |
| PCLN          | 0.5091  | 0.3054       | 0.2211         |
| QCOM          | 0.2444  | 0.0681       | 0.0853         |
| QGEN          | 0.3508  | 0.2262       | 0.2092         |
| RIMM          | 0.6587  | 0.5946       | 0.5564         |
| ROST          | -0.0847 | -0.1247      | -0.1385        |
| SBUX          | 0.4095  | 0.3263       | 0.2085         |
| SHLD          | 0.3826  | 0.3706       | 0.3563         |
| SIAL          | -0.0475 | -0.0053      | -0.0396        |
| SNDK          | 0.4510  | 0.3761       | 0.3404         |
| SPLS          | 0.1144  | -0.0184      | -0.0031        |
| SRCL          | 0.2695  | 0.1365       | 0.1023         |
| STX           | 0.3738  | 0.2979       | 0.2242         |
| SYMC          | 0.5761  | 0.3703       | 0.4122         |
| TEVA          | 0.4005  | 0.2934       | 0.3379         |
| URBN          | 0.3714  | 0.2841       | 0.2409         |
| VMED          | -0.0938 | -0.1070      | -0.0922        |
| VOD           | 0.1682  | 0.1599       | 0.1100         |
| VRSN          | 0.5551  | 0.3389       | 0.3199         |
| VRTX          | 0.5007  | 0.2135       | 0.1679         |
| WCRX          | 0.5106  | 0.3447       | 0.1688         |
| WFMI          | 0.4544  | 0.2279       | 0.1042         |
| YHOO          | 0.3750  | 0.2145       | 0.1299         |

We compute the cross-correlation coefficient  $r(0)$  between query and trading volumes after removing the days characterized by the highest trading volumes, respectively the top five and top ten events are removed. A significant correlation is still observed for most of the stocks considered.
